# Supplementary material for: Electronically and geometrically complementary perylenediimides for kinetically controlled supramolecular copolymers
Source: Royal Society of Chemistry journal article supplement (doi:10.1039/d4sc01322k), 2024-01-01
Supplement: d4sc01322k1.pdf [file d4sc01322k1.pdf]

Material for reviewers ms. SC-EDG-02-2024-001322

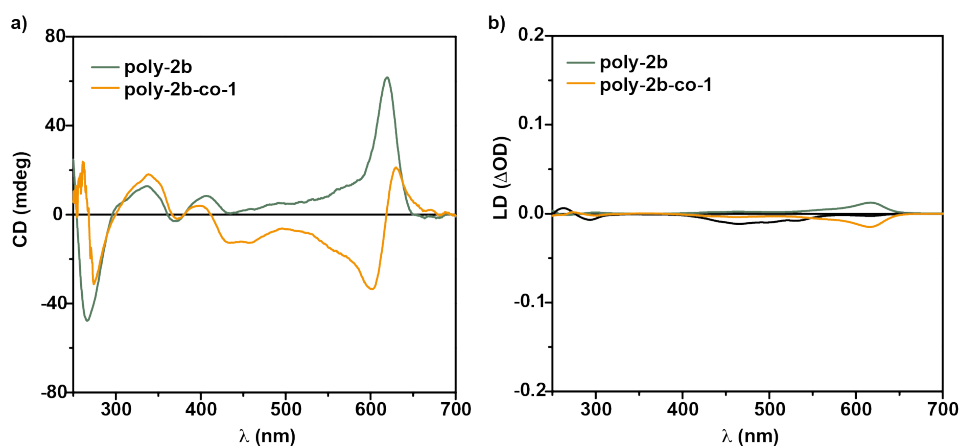

**Figure SM1.** a) CD and b) LD spectra of **poly-2b** and **poly-2b-co-1** (experimental conditions: MCH/DCE 7/3 as solvent,  $c_T = 10 \mu\text{M}$ ).

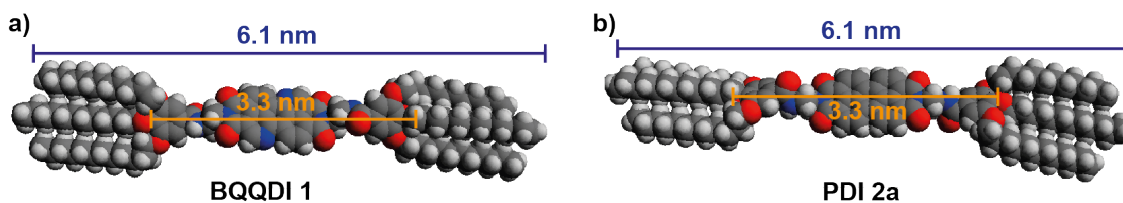

**Figure SM2.** Optimized geometry for the monomeric units of BQQDI 1 (a) and PDI 2 (b) showing the distances of the aromatic core, including the benzoate groups, and the complete molecule.
